# Supplementary material for: How to Measure Sedentary Behavior at Work?
Source: PubMed Central journal article supplement (PMC6633074; doi:10.3389/fpubh.2019.00167), 2019-07-05
Supplement: Table_1.pdf [file Table_1.pdf]

**Table S1.** Main characteristics of studies included in the systematic review, with methods to measure sedentariness (type of questionnaires and type of wearable devices, and main outcomes retrieved).

| First author, year     | Study Title                                                                                                                                                                | Population (n total) | Type of study   | Methods to measure sedentariness |                      |                                                           | Main measures of sedentariness                                      |               |
|------------------------|----------------------------------------------------------------------------------------------------------------------------------------------------------------------------|----------------------|-----------------|----------------------------------|----------------------|-----------------------------------------------------------|---------------------------------------------------------------------|---------------|
|                        |                                                                                                                                                                            |                      |                 | Questionnaires                   | Wearables devices    |                                                           |                                                                     | Other sensors |
|                        |                                                                                                                                                                            |                      |                 |                                  | Category             | Type                                                      |                                                                     |               |
| Aittasalo et al 2017   | Moving to business - Changes in physical activity and sedentary behavior after multilevel intervention in small and medium-size workplaces                                 | 396                  | Longitudinal    | Other questionnaire              | 1. One common sensor | Accelerometer                                             | Sitting and standing time/day, steps/day, sit/stand transitions     |               |
| Albawardi et al 2017   | Level of sedentary behavior and its associated factors among Saudi women working in office-based jobs in Saudi Arabia                                                      | 420                  | Cross-sectional | Other questionnaire              |                      |                                                           | Working sedentary and non-sedentary behaviors                       |               |
| Albawardi et al 2016   | Levels and correlates of physical activity, inactivity and body mass index among Saudi women working in office jobs in Riyadh city                                         | 420                  | Cross-sectional | Other questionnaire              |                      |                                                           | Sitting time                                                        |               |
| Alkatib et al 2013     | Sedentary risk factors across genders and job roles within a university campus workplace: preliminary study                                                                | 80                   | Cross-sectional | IPAQ                             |                      |                                                           | Working sitting time/week                                           |               |
| Alkhajah et al 2012    | Sit-stand workstations a pilot intervention to reduce office sitting time                                                                                                  | 33                   | Longitudinal    |                                  | 1. One common sensor | ActivPal3                                                 | Sitting time, breaks                                                |               |
| Ariens et al 2001      | Are neck flexion, neck rotation, and sitting at work risk factors for neck pain? Results of a prospective cohort study                                                     | 686                  | Cross-sectional | Other questionnaire              | 1. One common sensor | Camera                                                    | Sitting time, steps/day                                             |               |
| Bennie et al 2015      | Total and domain-specific sitting time among employees in desk-based work settings in Australia                                                                            | 801                  | Cross-sectional | Other questionnaire              |                      |                                                           | Sitting time, physical activity                                     |               |
| Bort-Roig et al 2018   | Monitoring sedentary patterns in office employees: validity of an m-health tool (Walk@Work-App) for occupational health                                                    | 17                   | Cross-sectional |                                  | 2. Multiple sensors  | Smartphone (Wow-App), ActivPal3TM, pedometer (YamaxSW200) | Working and leisure sedentary behavior, physical activity           |               |
| Boyle et al 2016       | Sedentary work and the risk of breast cancer in premenopausal and postmenopausal women: a pooled analysis of two case-control studies                                      | 1762                 | Cross-sectional | Other questionnaire              |                      |                                                           | Working, leisure sitting time                                       |               |
| Boyle et al 2011       | Long-term sedentary work and the risk of subsite-specific colorectal cancer                                                                                                | 1939                 | Cross-sectional | Other questionnaire              |                      |                                                           | Working, leisure, sitting, standing, time, sit-to-stand transitions |               |
| Brakenridge et al 2016 | Organizational-level strategies with or without an activity tracker to reduce office workers' sitting time: rationale and study design of a pilot cluster-randomized trial | 150                  | Longitudinal    | Other questionnaire              | 1. One common sensor | LumoBack, ActivPal 3                                      | Sitting time, steps counts                                          |               |
| Brakenridge et al 2016 | Evaluating the effectiveness of organisational-level strategies with or without an activity tracker to reduce office workers' sitting time: a cluster-randomised trial     | 153                  | Longitudinal    |                                  | 1. One common sensor | ActivPal3                                                 | Working, leisure, steps, sedentary behavior, physical activity      |               |

|                        |                                                                                                                                                                     |       |                 |                     |                                  |                                   |                                                                                                                          |
|------------------------|---------------------------------------------------------------------------------------------------------------------------------------------------------------------|-------|-----------------|---------------------|----------------------------------|-----------------------------------|--------------------------------------------------------------------------------------------------------------------------|
| Brakenridge et al 2018 | Evaluating short-term musculoskeletal pain changes in desk-based workers receiving a workplace sitting-reduction intervention                                       | 153   | Longitudinal    |                     | 1. One common sensor             | ActivPal3                         | Working, leisure, sitting time, prolonged bouts of sitting ( $\geq 30$ min), standing, and stepping time                 |
| Brisson et al 2000     | Psychosocial factors at work, smoking, sedentary behavior, and body mass index: A prevalence study among 6995 white collar workers                                  | 6995  | Cross-sectional | Other questionnaire |                                  |                                   | Working sitting time, standing time, steps counts                                                                        |
| Brown et al 2003       | Sitting time and work patterns as indicators of overweight and obesity in Australian adults                                                                         | 714   | Cross-sectional | Other questionnaire | 1. One common sensor             | Pedometer                         | Working sitting, standing and walking time, sitting time over the whole day                                              |
| Brown et al 2013       | Objectively measured sedentary behavior and physical activity in office employees relationships with presenteeism                                                   | 108   | Cross-sectional |                     | 1. One common sensor             | ActiGraph GT3X+                   | Working sitting, standing, stepping time, leisure physical activity                                                      |
| Bunan et al 2017       | An intervention to reduce sitting and increase light-intensity physical activity at work: Design and rationale of the 'Stand & Move at Work' group randomized trial | 720   | Longitudinal    |                     | 1. One common sensor             | Accelerometer                     | Working, leisure physical activity, sedentary                                                                            |
| Calijouw et al 2017    | IRAAAF's office landscape The End of Sitting: Energy expenditure and temporary comfort when working in non-sitting postures                                         | 24    | Longitudinal    |                     | 3. Complex physiological systems | Indirect calorimetry, Cosmed K4b2 | Working sitting time, steps, leisure total physical activity, light physical activity                                    |
| Carr et al 2012        | Feasibility of a portable pedal exercise machine for reducing sedentary time in the workplace                                                                       | 18    | Longitudinal    | Other questionnaire |                                  |                                   | Working sitting time, breaks, standing time, walking time, steps count                                                   |
| Carr et al 2016        | Total worker health intervention increases activity of sedentary workers                                                                                            | 54    | Longitudinal    | Other questionnaire |                                  |                                   | Working, leisure sitting, standing time, breaks, non-workday sitting, transport sitting, tv viewing                      |
| Chau et al 2014        | The effectiveness of sit-stand workstations for changing office workers' sitting time: results from the Stand@Work randomized controlled trial pilot                | 42    | Longitudinal    | Other questionnaire | 1. One common sensor             | ActivPal                          | Working sitting time, longest period of sitting time, sit-to-stand transitions, light physical activity, stairs, walking |
| Chau et al 2011        | A tool for measuring workers' sitting time by domain: the Workforce Sitting Questionnaire                                                                           | 95    | Cross-sectional | WSQ                 |                                  |                                   | Sitting time, walking time                                                                                               |
| Chau et al 2012        | cross-sectional associations between occupational and leisure-time sitting, physical activity and obesity in working adults                                         | 10785 | Cross-sectional | Other questionnaire |                                  |                                   | Walking time, total and moderate physical activity                                                                       |

|                      |                                                                                                                                                                |      |                 |                     |                      |                                           |                                       |                                                                            |
|----------------------|----------------------------------------------------------------------------------------------------------------------------------------------------------------|------|-----------------|---------------------|----------------------|-------------------------------------------|---------------------------------------|----------------------------------------------------------------------------|
| Chau et al 2012      | Validity of the Occupational Sitting and Physical Activity Questionnaire                                                                                       | 99   | Cross-sectional | OSPAQ, MOSPA-Q      | 1. One common sensor | ActiGraph                                 | Ecological momentary assessment (EMA) | Sitting, standing and walking time                                         |
| Chia et al 2015      | Office sitting made less sedentary - a future-forward approach to reducing physical inactivity at work                                                         | 21   | Longitudinal    |                     | 1. One common sensor | ActiTrainer (accelerometer + HR recorder) |                                       | Working, leisure, sitting time                                             |
| Cho et al 2013       | Analysis according to gender and body mass index of the number of steps taken by sedentary workers as measured by a pedometer                                  | 36   | Cross-sectional |                     | 1. One common sensor | Pedometer                                 |                                       | Working sitting time, pedalling time, speed, distance, calories            |
| Choi et al 2010      | Sedentary work, low physical job demand, and obesity in us workers                                                                                             | 2019 | Cross-sectional | Other questionnaire |                      |                                           |                                       | Sitting time                                                               |
| Choi et al 2016      | 24-hour work shifts, sedentary work, and obesity in male firefighters                                                                                          | 308  | Cross-sectional | Other questionnaire |                      |                                           |                                       | Working sitting time                                                       |
| Clark et al 2011     | Validity of self-reported measures of workplace sitting time and breaks in sitting time                                                                        | 121  | Cross-sectional | Other questionnaire | 1. One common sensor | Accelerometer                             |                                       | Working sitting time, light physical activity                              |
| Clemes et al 2014    | Office workers' objectively measured sedentary behavior and physical activity during and outside working hours                                                 | 170  | Cross-sectional |                     | 1. One common sensor | ActiGraph GT1M                            |                                       | Sitting and standing time                                                  |
| Coenen et al 2017    | Pre-existing low-back symptoms impact adversely on sitting time reduction in office workers                                                                    | 231  | Longitudinal    |                     | 1. One common sensor | ActivPal3TM                               |                                       | Working, leisure sitting time, number of breaks per day, physical activity |
| Cuthill et al 2008   | Anaesthesia - a sedentary specialty? Accelerometer assessment of the activity level of anaesthetists while at work                                             | 45   | Cross-sectional |                     | 1. One common sensor | Accelerometer                             |                                       | Sedentary breaks, physical activity                                        |
| Danquah et al 2017   | Take a Stand!-a multi-component intervention aimed at reducing sitting time among office workers-a cluster randomized trial                                    | 317  | Longitudinal    |                     | 1. One common sensor | ActiGraph GT3X (thigh)                    |                                       | Sitting time, physical activity                                            |
| De Cocker et al 2015 | Theory-driven, web-based, computer-tailored advice to reduce and interrupt sitting at work: development, feasibility and acceptability testing among employees | 112  | Longitudinal    | Other questionnaire |                      |                                           |                                       | Working sitting, standing, walking time                                    |
| De Cocker et al 2016 | The effectiveness of a web-based computer-tailored intervention on workplace sitting: a randomized controlled trial                                            | 213  | Longitudinal    | Other questionnaire |                      |                                           |                                       | Energy expenditure, mets                                                   |
| De Cocker et al 2014 | Understanding occupational sitting: Prevalence, correlates and moderating effects in Australian employees                                                      | 993  | Cross-sectional | WSQ                 |                      |                                           |                                       | Working sitting, standing, walking, energy expenditure, kcal/h             |
| Dollman et al 2016   | Validity of self-reported sedentary time differs between Australian rural men engaged in office and farming occupations                                        | 57   | Cross-sectional | Other questionnaire | 1. One common sensor | Inclinometer                              |                                       | Working, leisure, steps, active time                                       |
| Duncan et al 2015    | Identifying correlates of breaks in occupational sitting: a cross-sectional study                                                                              | 5531 | Cross-sectional | Other questionnaire |                      |                                           |                                       | Working sitting, standing, bouts duration                                  |

|                      |                                                                                                                                                                                                          |     |                 |                     |                      |                        |                                                                                                                                                          |
|----------------------|----------------------------------------------------------------------------------------------------------------------------------------------------------------------------------------------------------|-----|-----------------|---------------------|----------------------|------------------------|----------------------------------------------------------------------------------------------------------------------------------------------------------|
| Duncan et al 2013    | Development and reliability testing of a self-report instrument to measure the office layout as a correlate of occupational sitting                                                                      | 37  | Cross-sectional | Other questionnaire |                      |                        | Working, leisure, sitting, standing, physical activity time                                                                                              |
| Duning et al 2018    | The effect of interrupting sedentary behavior on the cardiometabolic health of adults with sedentary occupations a pilot study                                                                           | 21  | Longitudinal    |                     | 2. Multiple sensors  | ActiGraph, ActivPal    | Working sitting, standing, stepping, prolonged sitting bouts ( $\geq 30$ min)                                                                            |
| Dunstan et al 2013   | Reducing office workers' sitting time: rationale and study design for the Stand Up Victoria cluster randomized trial                                                                                     | 160 | Longitudinal    |                     | 1. One common sensor | ActivPal3              | Sitting time, prolonged sitting, standing, stepping, moderate-to-vigorous physical activity, steps at work and daily                                     |
| Edwardson et al 2018 | A three arm cluster randomised controlled trial to test the effectiveness and cost-effectiveness of the SMART Work & Life intervention for reducing daily sitting time in office workers: study protocol | 660 | Longitudinal    |                     | 1. One common sensor | ActivPal3 (wrist)      | Working sitting, standing, stepping time                                                                                                                 |
| Evans et al 2012     | Point-of-choice prompts to reduce sitting time at work: a randomized trial                                                                                                                               | 28  | Longitudinal    |                     | 1. One common sensor | ActivPal               | Working sitting time                                                                                                                                     |
| Fisher et al 2018    | Associations between the objectively measured office environment and workplace step count and sitting time: cross-sectional analyses from the active buildings study                                     | 131 | Cross-sectional |                     | 1. One common sensor | ActivPal               | Working sitting time, prolonged bouts ( $\geq 30$ min), standing time, sit-to-stand transitions, walking time, leisure physical activity                 |
| Foley et al 2016     | Sedentary behavior and musculoskeletal discomfort are reduced when office workers trial an activity-based work environment                                                                               | 88  | Longitudinal    | Other questionnaire | 1. One common sensor | Accelerometer          | Working, leisure, sitting time, prolonged bouts sitting time ( $\geq 30$ min), time between sitting bouts, standing time, stepping time, number of steps |
| Gao et al 2016       | Effects of environmental intervention on sedentary time, musculoskeletal comfort and work ability in office workers                                                                                      | 45  | Longitudinal    | Other questionnaire |                      |                        | Working, leisure, sitting time, prolonged sitting                                                                                                        |
| Gilson et al 2009    | Do walking strategies to increase physical activity reduce reported sitting in workplaces: a randomized control trial                                                                                    | 179 | Longitudinal    | Other questionnaire | 1. One common sensor | Pedometer (YamaxSW200) | Sitting time (accumulated in bouts $\geq 30$ min), standing, and moving                                                                                  |
| Gorman et al 2013    | Does an 'activity-permissive' workplace change office workers' sitting and activity time?                                                                                                                | 24  | Longitudinal    |                     | 1. One common sensor | ActivPal3              | Sitting time and bouts $> 30$ min                                                                                                                        |

|                     |                                                                                                                                                                                                                                                           |     |                 |                     |                      |                                                         |                                                                               |
|---------------------|-----------------------------------------------------------------------------------------------------------------------------------------------------------------------------------------------------------------------------------------------------------|-----|-----------------|---------------------|----------------------|---------------------------------------------------------|-------------------------------------------------------------------------------|
| Graves et al 2015   | Evaluation of sit-stand workstations in an office setting: a randomised controlled trial                                                                                                                                                                  | 46  | Longitudinal    | Other questionnaire |                      |                                                         | Working sitting time                                                          |
| Gremaud et al 2018  | Gamifying accelerometer use increases physical activity levels of sedentary office workers                                                                                                                                                                | 144 | Longitudinal    |                     | 1. One common sensor | Fitbit Zip                                              | Working sitting time, duration, breaks                                        |
| Grunseit et al 2013 | "Thinking on your feet": A qualitative evaluation of sit-stand desks in an Australian workplace                                                                                                                                                           | 13  | Longitudinal    | Other questionnaire |                      |                                                         | Working sitting standing and stepping time                                    |
| Gupta et al 2016    | Prediction of objectively measured physical activity and sedentariness among blue-collar workers using survey questionnaires                                                                                                                              | 214 | Cross-sectional | Other questionnaire | 1. One common sensor | Accelerometer                                           | Working sitting time, number of sitting bouts > 20,30 and 55 min              |
| Gupta et al 2016    | What is the effect on obesity indicators from replacing prolonged sedentary time with brief sedentary bouts, standing and different types of physical activity during working days? a cross-sectional accelerometer-based study among blue-collar workers | 692 | Cross-sectional |                     | 1. One common sensor | ActiGraph GTX 3+ (thigh)                                | Working sitting time, number and duration of bouts > 30 min prolonged sitting |
| Gupta et al 2016    | Are temporal patterns of sitting associated with obesity among blue-collar workers? A cross-sectional study using accelerometers                                                                                                                          | 205 | Cross-sectional |                     | 1. One common sensor | ActiGraphGT3X+ (thigh, trunk)                           | Sitting time, physical activity                                               |
| Hadgraft et al 2017 | Intervening to reduce workplace sitting: mediating role of social-cognitive constructs during a cluster randomised controlled trial                                                                                                                       | 231 | Longitudinal    |                     | 1. One common sensor | ActivPal3                                               | Sitting time, time of seat-cycle                                              |
| Hall et al 2015     | The effect of a sit-stand workstation intervention on daily sitting, standing and physical activity: protocol for a 12 month workplace randomised control trial                                                                                           | 30  | Longitudinal    |                     | 2. Multiple sensors  | ActiGraph GTX3+,ActivPal 3                              | Working, leisure, sitting, standing, light physical activity time             |
| Hallman et al 2015  | Prolonged sitting is associated with attenuated heart rate variability during sleep in blue-collar workers                                                                                                                                                | 138 | Longitudinal    |                     | 2. Multiple sensors  | ActiGraph: GTX3, ActiHeart                              | Sitting time, night heart rate variability                                    |
| Hallman et al 2016  | Temporal patterns of sitting at work are associated with neck-shoulder pain in blue-collar workers: a cross-sectional analysis of accelerometer data in the DPHACTO study                                                                                 | 659 | Cross-sectional |                     | 1. One common sensor | ActiGraph GT3X (thigh, hip, trunk, upper dominant harm) | Working, leisure sitting time                                                 |
| Hallman et al 2015  | Association between objectively measured sitting time and neck-shoulder pain among blue-collar workers                                                                                                                                                    | 202 | Cross-sectional |                     | 1. One common sensor | ActiGraph                                               | Sitting and standing time physical activity /day                              |
| Hallman et al 2019  | Objectively measured sitting and standing in workers: cross-sectional relationship with autonomic cardiac modulation                                                                                                                                      | 490 | Cross-sectional |                     | 2. Multiple sensors  | Accelerometer, HR recorder                              | Working, leisure, sitting time, bouts > 30 min                                |
| Hallman et al 2016  | Is prolonged sitting at work associated with the time course of neck-shoulder pain? A prospective study in Danish blue-collar workers                                                                                                                     | 625 | Cross-sectional |                     | 1. One common sensor | Accelerometer                                           | Sedentary time, breaks, light and moderate to vigorous physical activity      |
| Headley et al 2018  | Subjective and objective assessment of sedentary behavior among college employees                                                                                                                                                                         | 127 | Cross-sectional | OSPAQ               | 1. One common sensor | ActivPal3                                               | Working, leisure, physical activity, moderate physical activity               |

|                        |                                                                                                                                                                         |       |                 |                     |                      |                        |                                                                                                |
|------------------------|-------------------------------------------------------------------------------------------------------------------------------------------------------------------------|-------|-----------------|---------------------|----------------------|------------------------|------------------------------------------------------------------------------------------------|
| Healy et al 2016       | A cluster randomized controlled trial to reduce office workers' sitting time: effect on activity outcomes                                                               | 231   | Longitudinal    |                     | 1. One common sensor | ActivPal3 TM           | Moderate to vigorous physical activity (mets/day)                                              |
| Healy et al 2013       | Reducing sitting time in office workers: short-term efficacy of a multicomponent intervention                                                                           | 43    | Longitudinal    |                     | 1. One common sensor | ActivPal3              | Sitting time, light, moderate to vigorous physical activity                                    |
| Hendriksen et al 2016  | Longitudinal relationship between sitting time on a working day and vitality, work performance, presenteeism, and sickness absence                                      | 502   | Longitudinal    | Other questionnaire |                      |                        | Steps/day, light physical activity, sedentary time                                             |
| Honda et al 2014       | Identifying associations between sedentary time and cardio-metabolic risk factors in working adults using objective and subjective measures: a cross-sectional analysis | 661   | Cross-sectional | Other questionnaire | 1. One common sensor | Accelerometer          | Occupational sitting-time                                                                      |
| Hulsegge et al 2017    | Shift workers have similar leisure-time physical activity levels as day workers but are more sedentary at work                                                          | 200   | Cross-sectional |                     | 1. One common sensor | ActiGraph GT3X (thigh) | Working, leisure, sitting time, walking, standing time                                         |
| Hutchinson et al 2018  | Changes in sitting time and sitting fragmentation after a workplace sedentary behaviour intervention                                                                    | 36    | Longitudinal    |                     | 1. One common sensor | ActivPal3              | Working sitting time and whole day, physical activity job demand                               |
| Ishii et al 2018       | Work engagement, productivity, and self-reported work-related sedentary behavior among Japanese adults: a cross-sectional study                                         | 2572  | Cross-sectional | Other questionnaire |                      |                        | Working sitting time, sitting travelling time, leisure sitting time, screen time               |
| Jalayondeja et al 2017 | Break in sedentary behavior reduces the risk of noncommunicable diseases and cardiometabolic risk factors among workers in a petroleum company                          | 1133  | Cross-sectional | Other questionnaire |                      |                        | Working, leisure sitting time, tv time, leisure physical activity                              |
| Jancey et al 2014      | Application of the Occupational Sitting and Physical Activity Questionnaire (OSPAQ) to office based workers                                                             | 99    | Cross-sectional | OSPAQ               | 1. One common sensor | Accelerometer          | Sitting breaks and duration                                                                    |
| Jelsma et al 2019      | The Dynamic Work study: study protocol of a cluster randomized controlled trial of an occupational health intervention aimed at reducing sitting time in office workers | 250   | Longitudinal    | Other questionnaire | 1. One common sensor | ActivPal               | Working sedentary (sedentary occupations only; mixed occupations or non-sedentary occupations) |
| Johnsson et al 2017    | Occupational sedentariness and breast cancer risk                                                                                                                       | 29524 | Cross-sectional | other-questionnaire |                      |                        | Working sitting time                                                                           |
| Josephson et al 2013   | A sedentary job? Measuring the physical activity of emergency medicine residents                                                                                        | 98    | Cross-sectional |                     | 1. One common sensor | Pedometer              | Working sedentary behaviour, working physical activity                                         |
| Kayihan et al 2014     | Relationship between daily physical activity level and low back pain in young, female desk-job workers                                                                  | 133   | Cross-sectional | IPAQ-short          |                      |                        | Working and leisure physical activity                                                          |
| Kazi et al 2014        | A survey of sitting time among UK employees                                                                                                                             | 504   | Cross-sectional | Other questionnaire |                      |                        | Working, leisure sitting time                                                                  |

|                    |                                                                                                                                                    |       |                 |                     |                                  |                                            |                                                                                                                                                              |
|--------------------|----------------------------------------------------------------------------------------------------------------------------------------------------|-------|-----------------|---------------------|----------------------------------|--------------------------------------------|--------------------------------------------------------------------------------------------------------------------------------------------------------------|
| Keown et al 2018   | Device-measured sedentary behavior patterns in office-based university employees                                                                   | 78    | Cross-sectional |                     | 2. Multiple sensors              | ActiGraph GTX3+, ActivPal3                 | Working sitting time                                                                                                                                         |
| Kikuchi et al 2015 | Occupational sitting time and risk of all-cause mortality among Japanese workers                                                                   | 36516 | Longitudinal    | Other questionnaire |                                  |                                            | Working, transport, leisure sitting time, physical activity                                                                                                  |
| Kirk et al 2016    | Patterns of sedentary behaviour in female office workers                                                                                           | 27    | Cross-sectional | Other questionnaire | 1. One common sensor             | ActivPal T                                 | Sedentary time, breaks number                                                                                                                                |
| Korshoj et al 2018 | Is objectively measured sitting at work associated with low-back pain? A cross-sectional study in the DPhacto cohort                               | 704   | Cross-sectional |                     | 1. One common sensor             | Accelerometer                              | Working, leisure sitting time, steps/hour, steps/day                                                                                                         |
| Lamar et al 2016   | Sedentary behavior in the workplace: a potential occupational hazard for radiologists                                                              | 89    | Cross-sectional | Other questionnaire | 1. One common sensor             | Fitbit One                                 | Working sitting time, prolonged sitting time, screen time, driving time                                                                                      |
| Levine et al 2007  | The energy expenditure of using a "walk-and-work" desk for office workers with obesity                                                             | 15    | Longitudinal    |                     | 3. Complex physiological systems | Indirect calorimetry, Columbus Instruments | Average week working, week-end, sitting, standing, time, steps, sit to stand transitions                                                                     |
| Li et al 2017      | Reducing office workers' sitting time at work using sit-stand protocols: results from a pilot randomized controlled trial                          | 26    | Longitudinal    | Other questionnaire | 1. One common sensor             | ActivPal                                   | Working sitting time breaks from sitting (frequency/per work hour)                                                                                           |
| Lin et al 2018     | A "Sit less, walk more" workplace intervention for office workers: long-term efficacy of a quasi-experimental study                                | 101   | Longitudinal    | Other questionnaire |                                  |                                            | Working sedentary time, leisure and all day, moderate to vigorous physical activity                                                                          |
| Lin et al 2017     | Short-term efficacy of a "sit less, walk more" workplace intervention on improving cardiometabolic health and work productivity in office workers  | 99    | Longitudinal    | Other questionnaire |                                  |                                            | Working sedentary activities, sitting time                                                                                                                   |
| Lindsay et al 2016 | Time kinetics of physical activity, sitting, and quality of life measures within a regional workplace: a cross-sectional analysis                  | 346   | Cross-sectional | IPAQ                |                                  |                                            | Working sitting and standing time, TV time, leisure sitting time                                                                                             |
| Lunde et al 2017   | Associations of objectively measured sitting and standing with low-back pain intensity: a 6-month follow-up of construction and healthcare workers | 124   | Cross-sectional |                     | 1. One common sensor             | ActiGraph GT3X+ (thigh)                    | Working sedentary time, physical activity                                                                                                                    |
| Lynch et al 2013   | A case-control study of lifetime occupational sitting and likelihood of breast cancer                                                              | 2452  | Cross-sectional | Other questionnaire |                                  |                                            | Working sitting time, breaks in sitting time, working sedentary time (hours per day, <100 counts per minute) and breaks per sedentary hour (number of times, |

|                          |                                                                                                                                                            |        |                 |                     |                      |                                                                                                                                             |                                                                                                                                 |
|--------------------------|------------------------------------------------------------------------------------------------------------------------------------------------------------|--------|-----------------|---------------------|----------------------|---------------------------------------------------------------------------------------------------------------------------------------------|---------------------------------------------------------------------------------------------------------------------------------|
| Mackenzie et al 2015     | Acceptability and feasibility of a low-cost, theory-based and co-produced intervention to reduce workplace sitting time in desk-based university employees | 17     | Longitudinal    | Other questionnaire |                      |                                                                                                                                             | >= 100 counts per minute)<br>Working sitting time, occupational energy expenditure, leisure physical activity                   |
| Mainsbridge et al 2014   | The effect of an e-health intervention designed to reduce prolonged occupational sitting on mean arterial pressure                                         | 29     | Longitudinal    | OSPAQ               |                      |                                                                                                                                             | Working, leisure and transport-related sitting time, screen time                                                                |
| Mansoubi et al 2016      | Using sit-to-stand workstations in offices: is there a compensation effect?                                                                                | 40     | Longitudinal    |                     | 2. Multiple sensors  | ActiGraphGT3X+, ActivPal                                                                                                                    | Working sitting, standing, walking, or heavy labour time, transport-related walking, leisure-time sitting and physical activity |
| Matic et al 2011         | Smart phone sensing to examine effects of social interactions and non-sedentary work time on mood changes                                                  | 9      | Cross-sectional |                     | 1. One common sensor | Smartphone                                                                                                                                  | Working standing and sitting posture                                                                                            |
| Matsuo et al 2016        | Percentage-method improves properties of Workers' Sitting-and Walking-Time Questionnaire                                                                   | 65     | Cross-sectional | WSQ                 | 1. One common sensor | ActivPal                                                                                                                                    | Working sitting time                                                                                                            |
| McCrary et al 2009       | Sedentariness at work: how much do we really sit?                                                                                                          | 21     | Cross-sectional |                     | 2. Multiple sensors  | Physical Activity Monitoring System: 4 inclinometers, 2 accelerometers (attached to the torso, thigh, and trunk using unique undergarments) | Working sitting, tv time                                                                                                        |
| Miyachi et al 2015       | Installation of a stationary high desk in the workplace: effect of a 6-week intervention on physical activity                                              | 32     | Longitudinal    |                     | 1. One common sensor | Accelerometer                                                                                                                               | Working sedentary behavior, job strain                                                                                          |
| Moerl et al 2013         | Lumbar posture and muscular activity while sitting during office work                                                                                      | 13     | Cross-sectional |                     | 1. One common sensor | sEMG                                                                                                                                        | Sitting time, breaks                                                                                                            |
| Moller et al 2016        | Multi-wave cohort study of sedentary work and risk of ischennic heart disease                                                                              | 145850 | Longitudinal    | Other questionnaire |                      |                                                                                                                                             | Working and leisure sitting, standing, walking, carrying loads time                                                             |
| Moreno-Franco et al 2015 | Association between daily sitting time and prevalent metabolic syndrome in an adult working population: the AWHS cohort                                    | 1415   | Cross-sectional | Other questionnaire |                      |                                                                                                                                             | Work-related sedentary behavior                                                                                                 |



|                      |                                                                                                                                                                                                           |      |                 |                                                 |                      |                             |                                                                                    |
|----------------------|-----------------------------------------------------------------------------------------------------------------------------------------------------------------------------------------------------------|------|-----------------|-------------------------------------------------|----------------------|-----------------------------|------------------------------------------------------------------------------------|
| Mullane et al 2017   | Social ecological correlates of workplace sedentary behavior                                                                                                                                              | 478  | Cross-sectional |                                                 | 1. One common sensor | ActivPal                    | Working and leisure sitting time, physical activity                                |
| Munir et al 2015     | Work engagement and its association with occupational sitting time: results from the Stormont study                                                                                                       | 4436 | Cross-sectional | Other questionnaire                             |                      |                             | Working sitting time                                                               |
| Nagaya et al 2001    | Effects of sedentary work on physical fitness and serum cholesterol profile in middle-aged male workers                                                                                                   | 1117 | Cross-sectional | Other questionnaire                             |                      |                             | Sedentary work and low physical activity job demand                                |
| Neuhaus et al 2014   | Workplace sitting and height-adjustable workstations a randomized controlled trial                                                                                                                        | 34   | Longitudinal    |                                                 | 1. One common sensor | ActivPal3                   | Sedentary work, physical activity                                                  |
| Neuhaus et al 2014   | Iterative development of Stand Up Australia: a multi-component intervention to reduce workplace sitting                                                                                                   | 32   | Longitudinal    |                                                 | 1. One common sensor | ActivPal3                   | Working time spend in sedentary position                                           |
| Nooijen et al 2019   | Improving office workers' mental health and cognition: a 3-arm cluster randomized controlled trial targeting physical activity and sedentary behavior in multi-component interventions                    | 330  | Longitudinal    | Other questionnaire                             | 2. Multiple sensors  | Accelerometer, inclinometer | Working, leisure and transport sitting time and physical activity                  |
| O'Connell et al 2015 | Providing NHS staff with height-adjustable workstations and behaviour change strategies to reduce workplace sitting time: protocol for the Stand More AT (SMaRT) Work cluster randomised controlled trial | 238  | Longitudinal    |                                                 | 1. One common sensor | ActivPal                    | Sitting time                                                                       |
| Oliver et al 2010    | Utility of accelerometer thresholds for classifying sitting in office workers                                                                                                                             | 21   | Cross-sectional |                                                 | 2. Multiple sensors  | ActiCal, ActvPal            | Working sitting time, leisure, time commuting                                      |
| Olsen et al 2018     | A brief self-directed intervention to reduce office employees' sedentary behavior in a flexible workplace                                                                                                 | 30   | Longitudinal    | Other questionnaire                             |                      |                             | Working, leisure and transport-relayed physical activity, sitting time,            |
| Olsen et al 2018     | Flexible work: the impact of a new policy on employees' sedentary behavior and physical activity                                                                                                          | 24   | Cross-sectional | Other questionnaire                             |                      |                             | Working and day sitting time                                                       |
| Parry et al 2013     | Participatory workplace interventions can reduce sedentary time for office workers-a randomised controlled trial                                                                                          | 62   | Longitudinal    |                                                 | 1. One common sensor | ActiGraph GT3X              | Physical activity, physical inactivity                                             |
| Pedersen et al 2016  | Is self-reporting workplace activity worthwhile? Validity and reliability of occupational sitting and physical activity questionnaire in desk-based workers                                               | 236  | Longitudinal    | IPAQ                                            | 1. One common sensor | ActivPal                    | Walking steps/day                                                                  |
| Pedersen et al 2016  | Intra-individual variability in day-to-day and month-to-month measurements of physical activity and sedentary behaviour at work and in leisure-time among Danish adults                                   | 135  | Cross-sectional |                                                 | 1. One common sensor | ActiGraphGT3X+ (thigh)      | Sedentary time, prolonged sedentary time                                           |
| Pedusic et al 2014   | Workplace Sitting Breaks Questionnaire (SITBRQ): an assessment of concurrent validity and test-retest reliability                                                                                         | 147  | Cross-sectional | SITBRQ (Workplace Sitting Breaks Questionnaire) | 1. One common sensor | ActiGraph GT1M              | Working physical activity, leisure physical activity, estimated energy expenditure |

|                                |                                                                                                                                                                         |       |                 |                     |                      |                                                |                                                                                                                       |
|--------------------------------|-------------------------------------------------------------------------------------------------------------------------------------------------------------------------|-------|-----------------|---------------------|----------------------|------------------------------------------------|-----------------------------------------------------------------------------------------------------------------------|
| Pereira et al 2012             | Sedentary behaviour and biomarkers for cardiovascular disease and diabetes in mid-life: the role of television-viewing and sitting at work                              | 7660  | Cross-sectional | Other questionnaire |                      |                                                | Working physical activity, sedentary leisure time activity                                                            |
| Picavet et al 2016             | The Relation between occupational sitting and mental, cardiometabolic, and musculoskeletal health over a period of 15 years - The Doetinchem cohort study               | 1509  | Longitudinal    | Other questionnaire |                      |                                                | Working sitting time                                                                                                  |
| Pontt et al 2015               | Comparison of sedentary behaviours among rural men working in offices and on farms                                                                                      | 116   | Cross-sectional |                     | 1. One common sensor | ActivPal (thigh)                               | Working sitting, standing, walking time                                                                               |
| Priebe et al 2015              | Less sitting and more moving in the office: using descriptive norm messages to decrease sedentary behavior and increase light physical activity at work                 | 142   | Longitudinal    | Other questionnaire |                      |                                                | Working, leisure, time spent sitting, standing, stepping, and total number of steps                                   |
| Puig-Ribeira et al 2017        | Impact of a workplace 'sit less, move more' program on efficiency-related outcomes of office employees                                                                  | 264   | Longitudinal    | Other questionnaire | 1. One common sensor | Pedometer                                      | Working sitting, standing and walking time                                                                            |
| Puig-Ribera et al 2015         | Patterns of impact resulting from a 'Sit less, move more' web-based program in sedentary office employees                                                               | 263   | Longitudinal    | IPAQ-short          |                      |                                                | Occupational, leisure, total energy expenditure, energy expenditure by occupational category (light, moderate, heavy) |
| Puig-Ribera et al 2015         | Self-reported sitting time and physical activity: interactive associations with mental well-being and productivity in office employees                                  | 557   | Cross-sectional | IPAQ-short          |                      |                                                | Working sitting time, physical activity and while travelling on weekend                                               |
| Radas et al 2013               | Evaluation of ergonomic and education interventions to reduce occupational sitting in office-based university workers: study protocol for a randomized controlled trial | 60    | Longitudinal    | OSPAQ               | 1. One common sensor | ActiGraph GT3X                                 | Low, moderate and high physical activity/day, met score                                                               |
| Rodriguez-Hernandez et al 2019 | The effect of 2 walking programs on aerobic fitness, body composition, and physical activity in sedentary office employees                                              | 24    | Longitudinal    |                     | 1. One common sensor | Accelerometer (wrist)                          | Working sitting, standing, walking and vigorous activities                                                            |
| Ryan et al 2011                | Sitting patterns at work: objective measurement of adherence to current recommendations                                                                                 | 83    | Longitudinal    |                     | 1. One common sensor | ActivPal TM                                    | Sitting time, walking time, vigorous and total physical activity                                                      |
| Ryde et al 2012                | Validation of a novel, objective measure of occupational sitting                                                                                                        | 13    | Cross-sectional |                     | 2. Multiple sensors  | Sitting pad, ActivPal3, ActiGraph GT3X, camera | Working sitting, standing, walking and vigorous activities                                                            |
| Ryde et al 2013                | Desk-based occupational sitting patterns weight-related health outcomes                                                                                                 | 105   | Cross-sectional |                     | 2. Multiple sensors  | Sitting pad, ActiGraph GT3X                    | Working sitting time, steps counts                                                                                    |
| Saidj et al 2015               | Descriptive study of sedentary behaviours in 35,444 French working adults: cross-sectional findings from the ACTI-Cites study                                           | 35444 | Cross-sectional | Other questionnaire |                      |                                                | Working and leisure sedentary behavior                                                                                |

|                              |                                                                                                                                                                      |        |                 |                     |                      |               |                                                                                                                                                                                                                                           |
|------------------------------|----------------------------------------------------------------------------------------------------------------------------------------------------------------------|--------|-----------------|---------------------|----------------------|---------------|-------------------------------------------------------------------------------------------------------------------------------------------------------------------------------------------------------------------------------------------|
| Saidj et al 2013             | Separate and joint associations of occupational and leisure-time sitting with cardio-metabolic risk factors in working adults: a cross-sectional study               | 2544   | Cross-sectional | Other questionnaire |                      |               | Working sitting time, transition                                                                                                                                                                                                          |
| Schuna et al 2014            | Evaluation of a workplace treadmill desk intervention: a randomized controlled trial                                                                                 | 41     | Longitudinal    |                     | 1. One common sensor | Accelerometer | Working sitting time and breaks, sit-to-stand transitions                                                                                                                                                                                 |
| Schwartz et al 2016          | Effect of a novel two-desk sit-to-stand workplace (ACTIVE OFFICE) on sitting time, performance and physiological parameters: protocol for a randomized control trial | 18     | Longitudinal    | IPAQ-long           |                      |               | Working upper limb movement, emg, heart rate, estimated energy expenditure                                                                                                                                                                |
| Sharma et al 2018            | A quantitative evaluation of electric sit-stand desk usage: 3-month in-situ workplace study                                                                          | 364    | Cross-sectional |                     |                      |               | Working sitting, standing and walking time                                                                                                                                                                                                |
| Simons et al 2013            | Physical activity, occupational sitting time, and colorectal cancer risk in the netherlands cohort study                                                             | 120852 | Cross-sectional | Other questionnaire |                      |               | Working and leisure sitting, walking time, walking velocity, daily energy estimation                                                                                                                                                      |
| Sisson et al 2009            | Leisure time sedentary behavior, occupational/domestic physical activity, and metabolic syndrome in us men and women                                                 | 3556   | Cross-sectional | Other questionnaire |                      |               | Working sitting time, frequency and duration leisure physical activity                                                                                                                                                                    |
| Sitthipornvorakul et al 2015 | The effect of daily walking steps on preventing neck and low back pain in sedentary workers: a 1-year prospective cohort study                                       | 387    | Cross-sectional | Other questionnaire |                      |               | Steps by 12h-shift                                                                                                                                                                                                                        |
| Smith et al 2015             | Weekday and weekend patterns of objectively measured sitting, standing, and stepping in a sample of office-based workers: the active buildings study                 | 164    | Longitudinal    |                     |                      |               |                                                                                                                                                                                                                                           |
| Stamatakis et al 2012        | Sedentary time in relation to cardio-metabolic risk factors: differential associations for self-report vs accelerometry in working age adults                        | 1150   | Cross-sectional | Other questionnaire | 1. One common sensor | Accelerometer | Sedentary time (h/day), sedentary bouts (h/day), length of work sedentary bouts (min), number of breaks in sedentary behaviour at work (per day), length of breaks in sedentary behaviour at work (min), number of steps per hour at work |
| Stoy et al 2004              | Semen quality and sedentary work position                                                                                                                            | 1747   | Cross-sectional | Other questionnaire |                      |               | Working sitting, standing, light physical activity, stepping cadence < 100 steps/min), and prolonged sitting bouts (> 30 min)                                                                                                             |

|                          |                                                                                                                                                           |      |                 |                     |                      |                                  |                                                                                                                                                                                                                     |
|--------------------------|-----------------------------------------------------------------------------------------------------------------------------------------------------------|------|-----------------|---------------------|----------------------|----------------------------------|---------------------------------------------------------------------------------------------------------------------------------------------------------------------------------------------------------------------|
| Sturgeon et al 2017      | Nurse Educators' Occupational and Leisure Sitting Time                                                                                                    | 56   | Cross-sectional | WSQ                 |                      |                                  | Working steps and % sitting time/h                                                                                                                                                                                  |
| Sudholz et al 2018       | Reliability and validity of self-reported sitting and breaks from sitting in the workplace                                                                | 39   | Cross-sectional | Other questionnaire | 2. Multiple sensors  | ActiGraph , ActivPal             | Working, leisure, sedentary time (sit and lie), brief ( $\leq 5$ mins), moderate ( $>5$ and $\leq 30$ mins), and long ( $>30$ mins) bouts, standing time, walking time, moderate to vigorous physical activity time |
| Taylor et al 2016        | Impact of booster breaks and computer prompts on physical activity and sedentary behavior among desk-based workers: a cluster-randomized controlled trial | 175  | Longitudinal    | Other questionnaire | 1. One common sensor | Pedometer                        | Working, leisure, sitting time, prolonged sitting ( $\leq 5$ mins), ( $>5$ and $\leq 30$ mins), ( $>30$ mins) bouts, moderate to vigorous physical activity                                                         |
| Tissot et al 2005        | Standing, sitting and associated working conditions in the Quebec population in 1998                                                                      | 9425 | Cross-sectional | Other questionnaire |                      |                                  | Working, leisure, sitting , standing time, steps, moderate to vigorous physical activity (MVPA)                                                                                                                     |
| Tsurumi et al 2002       | Estimation of energy expenditure during sedentary work with upper limb movement                                                                           | 12   | Cross-sectional |                     | 2. Multiple sensors  | sEMG, accelerometer, HR recorder | Working, leisure, light-intensity, moderate-to-vigorous physical activity, time lying, standing, stepping, prolonged sedentary bouts, breaks in sedentary time                                                      |
| Tudor-Locke et al 2009   | Leisure-time physical activity and occupational sitting: Associations with steps/day and BMI in 54-59 year old Australian women                           | 158  | Cross-sectional |                     | 1. One common sensor | Pedometer                        | Working, leisure sitting, standing time                                                                                                                                                                             |
| Uijdewilligen et al 2017 | Correlates of occupational, leisure and total sitting time in working adults: results from the Singapore multi-ethnic cohort                              | 9384 | Cross-sectional | Other questionnaire |                      |                                  | Working sedentary time ( $\leq 150$ counts) and light physical activity (151 to 1689 counts)                                                                                                                        |
| Van Dommelen et al 2016  | Objectively measured total and occupational sedentary time in three work settings                                                                         | 205  | Cross-sectional |                     | 1. One common sensor | ActiGraph                        | Working, leisure, sitting time, (brief (0-5 min), moderate ( $> 5$ -20 min) and prolonged ( $> 20$                                                                                                                  |

|                              |                                                                                                                                                                                                |      |                 |                     |                      |                     |                                                                                                                                                                                                      |
|------------------------------|------------------------------------------------------------------------------------------------------------------------------------------------------------------------------------------------|------|-----------------|---------------------|----------------------|---------------------|------------------------------------------------------------------------------------------------------------------------------------------------------------------------------------------------------|
|                              |                                                                                                                                                                                                |      |                 |                     |                      |                     | min) bouts), physical activity, working, leisure sitting with upper arm over 90° (h/day)                                                                                                             |
| Van Dyck et al 2015          | The contribution of former work-related activity levels to predict physical activity and sedentary time during early retirement: moderating role of educational level and physical functioning | 392  | Cross-sectional | IPAQ                |                      |                     | Working, leisure, sitting time, prolonged sitting bouts ≥30 min, total physical activity, light and moderate physical activity                                                                       |
| Van Nassau et al 2015        | Validity and responsiveness of four measures of occupational sitting and standing                                                                                                              | 42   | Longitudinal    | OSPAQ, WSQ          | 2. Multiple sensors  | ActiGraph, ActivPal | Working and leisure time spent sedentary (<100 cpm), in light-intensity physical activity (100 to 1951 cpm), and moderate-to-vigorous physical activity (1952 cpm), and non working and non workdays |
| Vandelanotte et al 2013      | Associations between occupational indicators and total, work-based and leisure-time sitting: a cross-sectional study                                                                           | 1194 | Cross-sectional | WSQ                 |                      |                     | Working, leisure, sedentary time, light, moderate to vigorous physical activity, prolonged sitting bouts (≥ 30 min)                                                                                  |
| Vaz et al 2004               | How sedentary are people in 'sedentary' occupations? The physical activity of teachers in urban South India                                                                                    | 198  | Cross-sectional | Other questionnaire |                      |                     | Sitting time, at work and leisure                                                                                                                                                                    |
| Verweij et al 2012           | The application of an occupational health guideline reduces sedentary behaviour and increases fruit intake at work: results from a randomized controlled trial                                 | 523  | Longitudinal    | Other questionnaire |                      |                     | Working sitting time                                                                                                                                                                                 |
| Wallmann-Sperlich et al 2014 | Socio-demographic, behavioural and cognitive correlates of work-related sitting time in German men and women                                                                                   | 1515 | Cross-sectional | Other questionnaire |                      |                     | Working sitting, standing time, leisure sitting time, physical activity, heart rate, hrv                                                                                                             |
| Waters et al 2016            | Assessing and understanding sedentary behaviour in office-based working adults: a mixed-method approach                                                                                        | 33   | Cross-sectional | Other questionnaire | 1. One common sensor | Accelerometer       | Working, leisure, sitting time, sitting bouts ≥ 5 min, >5-≤20min, >20min                                                                                                                             |
| Wong et al 2014              | Patterns and perceptions of physical activity and sedentary time in male transport drivers working in regional Australia                                                                       | 23   | Cross-sectional |                     | 1. One common sensor | Accelerometer       | Working sitting time                                                                                                                                                                                 |

|                   |                                                                                                                                    |     |                 |                     |                                  |                      |                                             |                                                                                                |
|-------------------|------------------------------------------------------------------------------------------------------------------------------------|-----|-----------------|---------------------|----------------------------------|----------------------|---------------------------------------------|------------------------------------------------------------------------------------------------|
| Yao et al<br>2002 | Energy requirements of urban Chinese adults with manual or sedentary occupations, determined using the doubly labeled water method | 73  | Cross-sectional | MOSPA-Q             | 3. Complex physiological systems | Double labeled water |                                             | Working sitting, standing, walking time, steps                                                 |
| Yip et al<br>2004 | New low back pain in nurses: work activities, work stress and sedentary lifestyle                                                  | 144 | Cross-sectional | Other questionnaire |                                  |                      |                                             | Working sedentary (<150 cpm), pa: light (151-2,689 cpm) and moderate+ (2,690 cpm) and off-work |
| Zhu et al<br>2018 | Long-term effects of sit-stand workstations on workplace sitting: a natural experiment                                             | 36  | Longitudinal    |                     | 1. One common sensor             | ActivPal3c           | Electric-sit-stand desk computer monitoring | Working sitting or standing position, frequency of transition                                  |
